# Supplementary material for: Pan-Enterovirus Characterization Reveals Cryptic Circulation of Clinically Relevant Subtypes in Arizona Wastewater
Source: bioRxiv or medRxiv preprint supplement (doi:10.1101/2023.11.20.23297677), 2024-03-20

Tree scale: 0.1

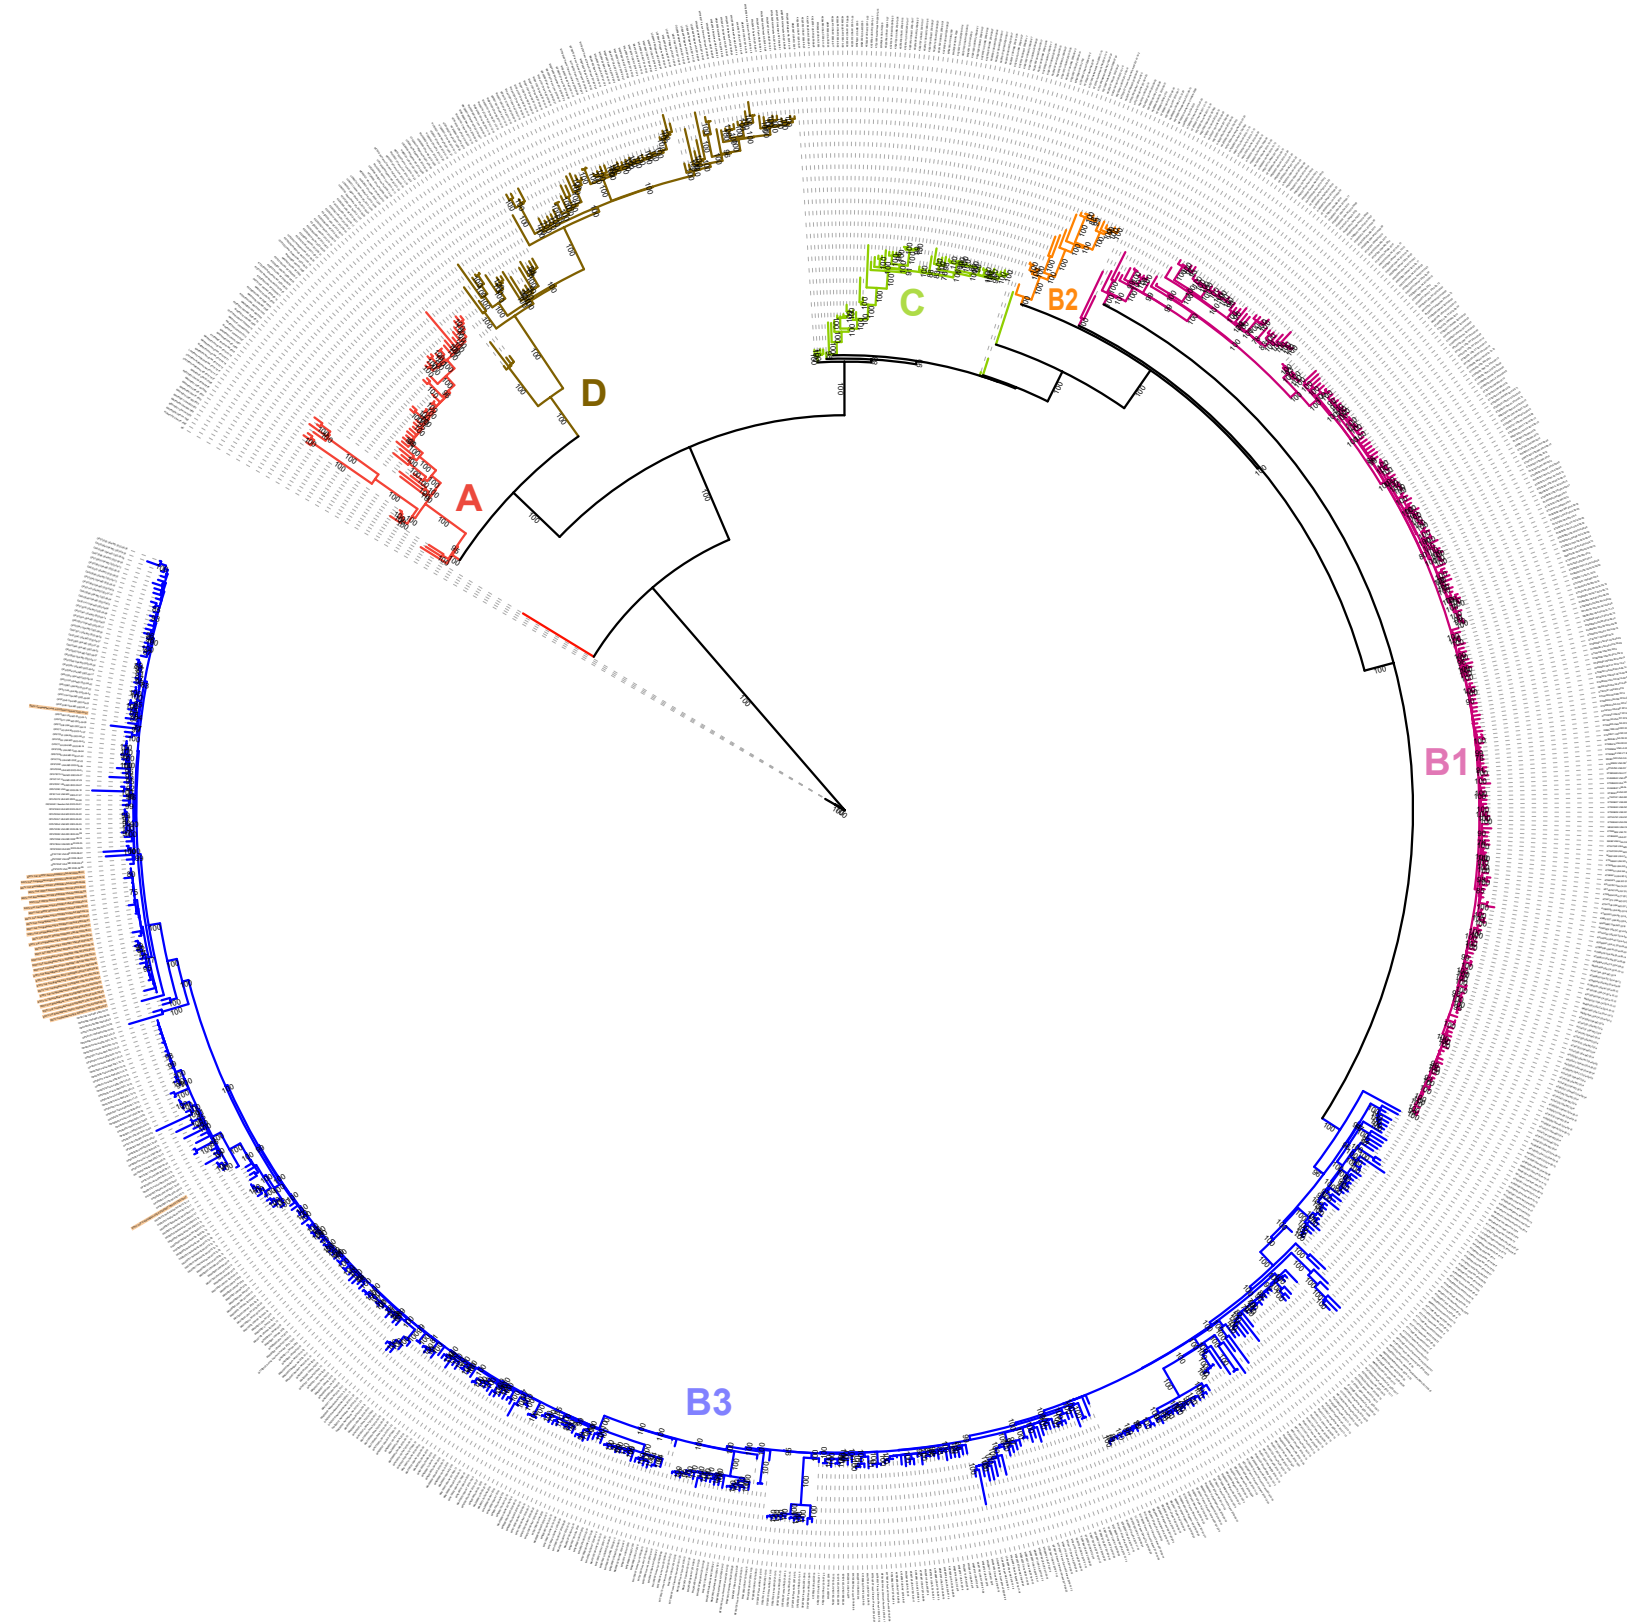

Supplement: Supplementary file [file media-4.pdf]
